# Supplementary material
Source: PubMed Central journal article supplement (PMC3269949)
Supplement: NIHMS330468-supplement-2.pdf [file NIHMS330468-supplement-2.pdf]

## Table of Contents

### Syntheses and Properties of Trimethylaminophenoxy-substituted Zn(II)-Phthalocyanines

Benson G. Ongarora, Xiaoke Hu, Hairong Li, Frank R. Fronczek and M. Graça H. Vicente

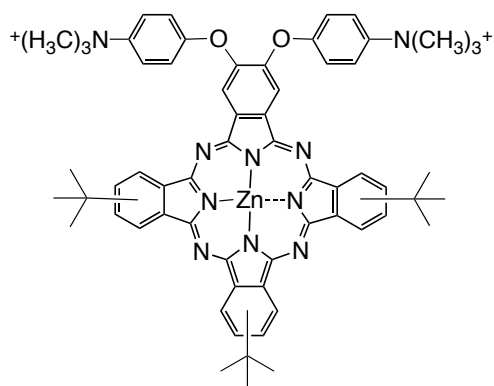

Structure-activity relationships (SAR) on a series of nine cationic ZnPcs are reported.

## Electronic Supplementary Information (ESI)

### Syntheses and Properties of Trimethylaminophenoxy-substituted Zn(II)-Phthalocyanines

Benson G. Ongarora, Xiaoke Hu, Hairong Li, Frank R. Fronczek and M. Graça H. Vicente\*

#### Table of Contents:

|                                                                 | Page |
|-----------------------------------------------------------------|------|
| <b>Table S1:</b> Spectroscopic data for ZnPcs in PBS (pH = 7.4) | 2    |
| <b>Figures S1-S9:</b> UV-Vis spectra for ZnPcs in DMF           | 3    |
| <b>Figures S10-S13:</b> UV-Vis spectra for ZnPcs in DMF and PBS | 12   |
| <b>Figure S14:</b> Emission spectra for ZnPcs in PBS            | 16   |
| <b>Figure S15:</b> UV-Vis spectra for ZnPcs in DMF              | 17   |
| <b>Figure S16:</b> Emission spectra for ZnPcs in DMF            | 18   |

**Table S1.** Spectroscopic data for cationic Pcs in PBS (pH = 7.4)

| <b>Pc</b> | <b>Absorption <math>\lambda_{\max}</math><br/>(nm)</b> | <b>Emission<sup>a</sup> <math>\lambda_{\max}</math><br/>(nm)</b> | <b>Stokes' shift<br/>(nm)</b> |
|-----------|--------------------------------------------------------|------------------------------------------------------------------|-------------------------------|
| 4a        | 679                                                    | 681                                                              | 2                             |
| 4b        | 677                                                    | 680                                                              | 3                             |
| 6a        | 680                                                    | 684                                                              | 4                             |
| 6b        | 678                                                    | 681                                                              | 3                             |
| 8         | 679                                                    | 682                                                              | 3                             |
| 12        | 678                                                    | 681                                                              | 3                             |
| 13        | 682                                                    | 685                                                              | 3                             |
| 14        | 680                                                    | 684                                                              | 4                             |
| 17a       | 680                                                    | 683                                                              | 3                             |
| 17b       | 677                                                    | 679                                                              | 2                             |

<sup>a</sup> Excitation at 630 nm.

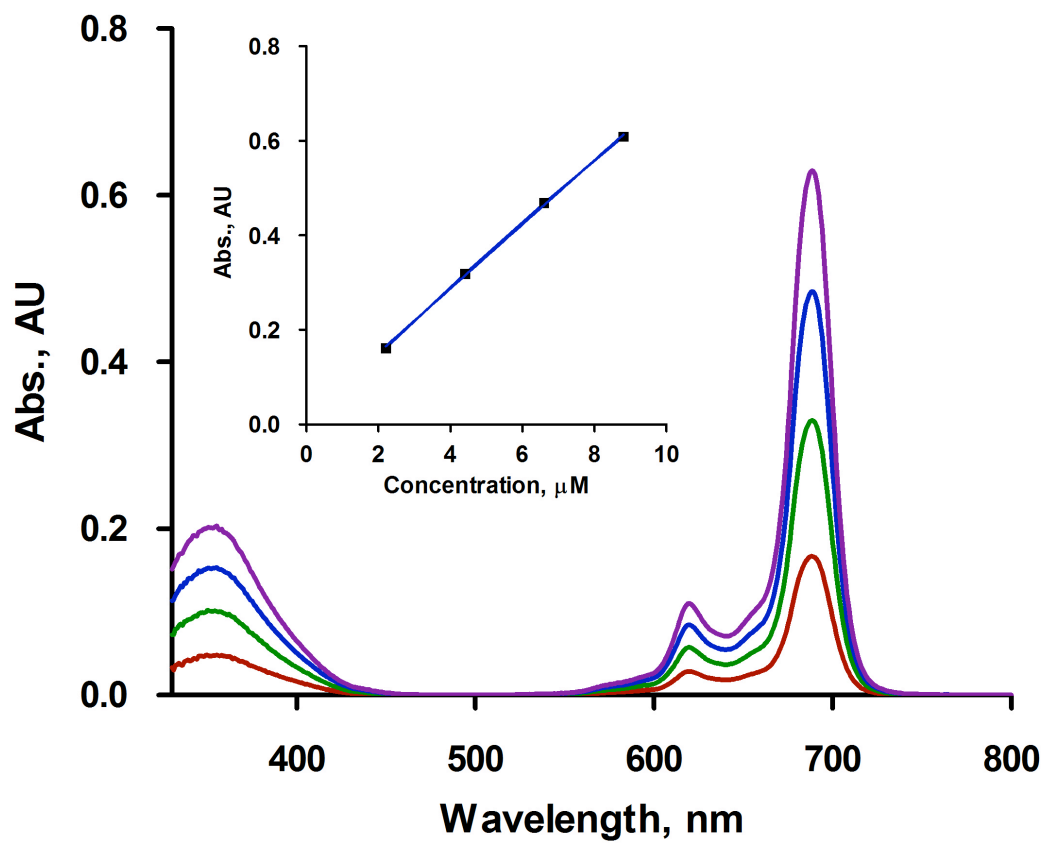

**Figure S1.** UV-Vis spectra for Pc **4a** in DMF: 2.2  $\mu\text{M}$  (red), 4.4  $\mu\text{M}$  (green), 6.6  $\mu\text{M}$  (blue) and 8.8  $\mu\text{M}$  (purple).

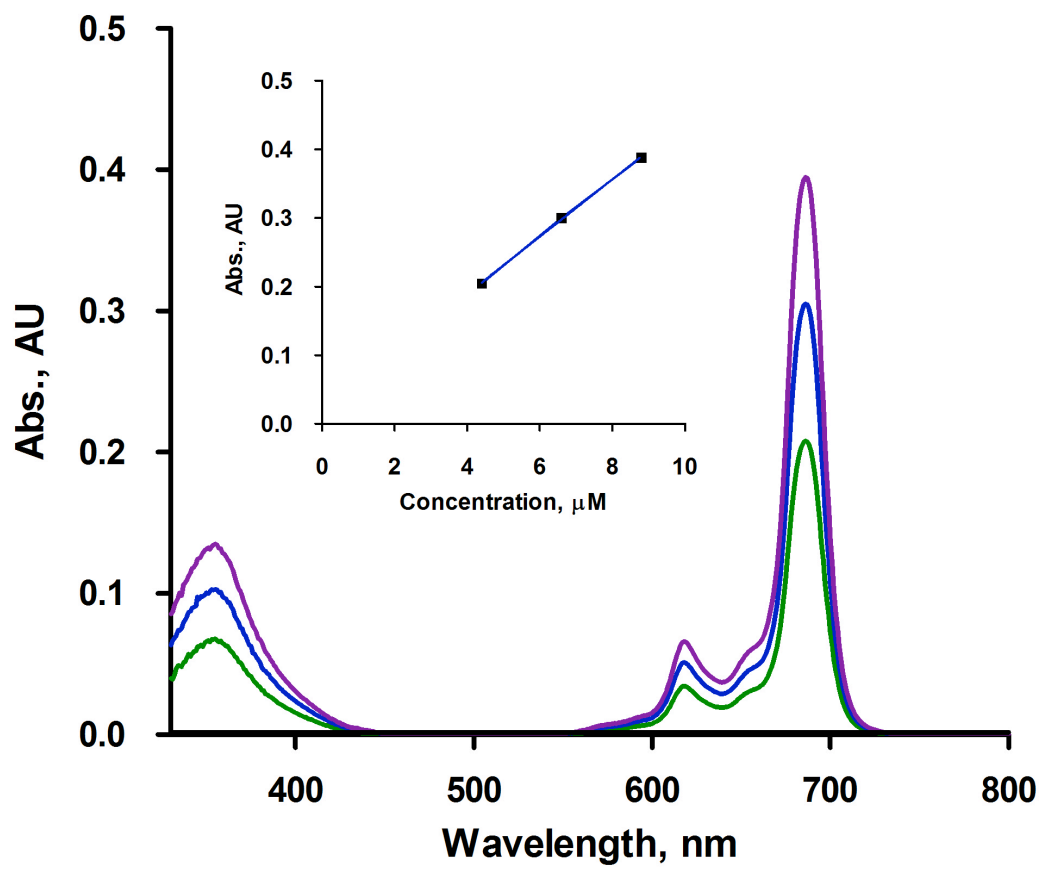

**Figure S2.** UV-Vis spectra for Pc **4b** in DMF: 4.4  $\mu\text{M}$  (green), 6.6  $\mu\text{M}$  (blue) and 8.8  $\mu\text{M}$  (purple).

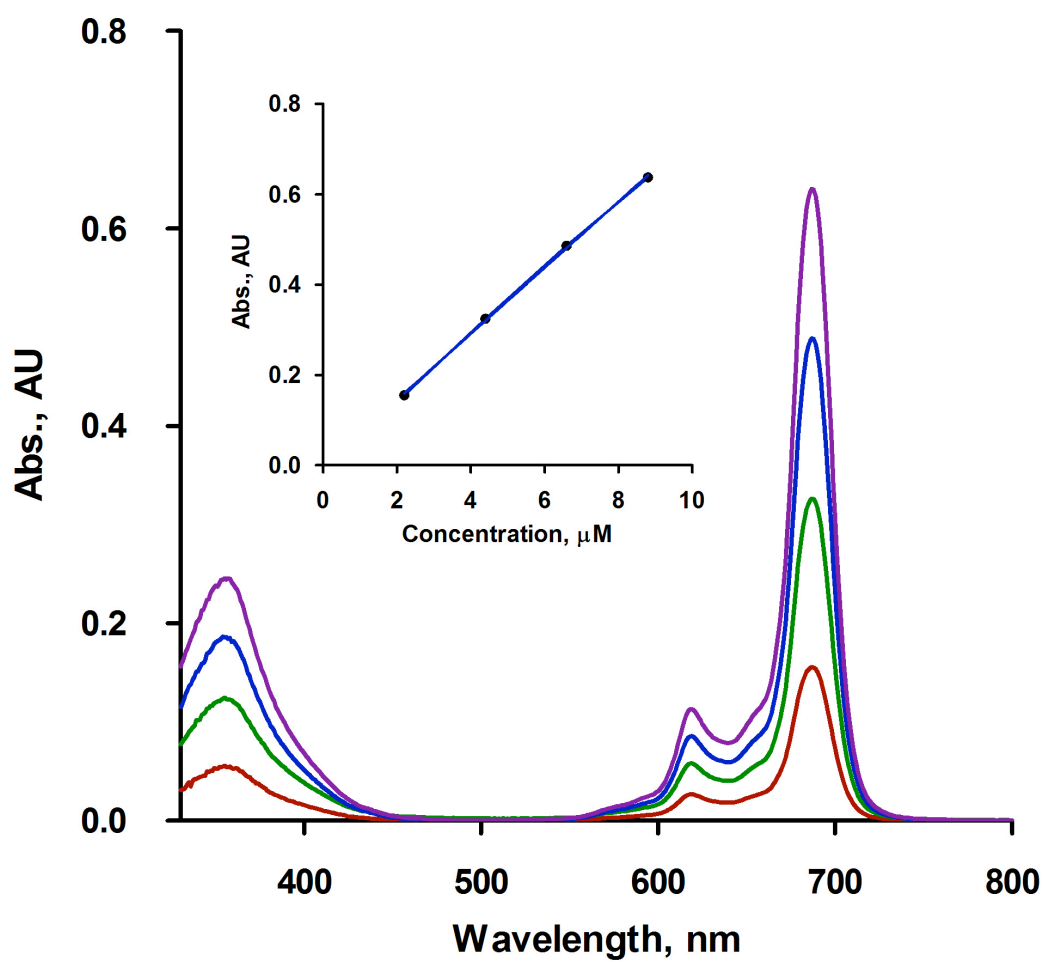

**Figure S3.** UV-Vis spectra for Pc **12** in DMF: 2.2  $\mu\text{M}$  (red), 4.4  $\mu\text{M}$  (green), 6.6  $\mu\text{M}$  (blue) and 8.8  $\mu\text{M}$  (purple).

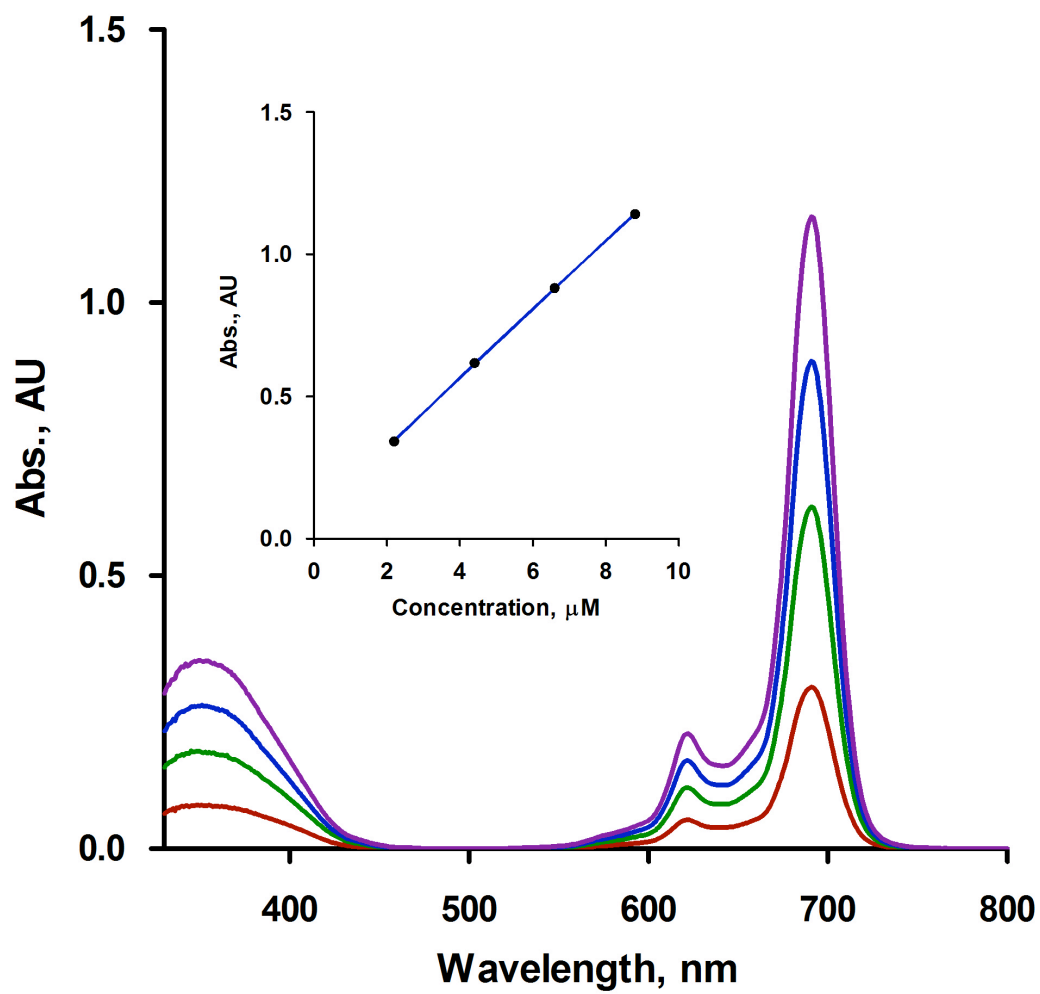

**Figure S4.** UV-Vis spectra for Pc **6a** in DMF: 2.2 μM (red), 4.4 μM (green), 6.6 μM (blue) and 8.8 μM (purple).

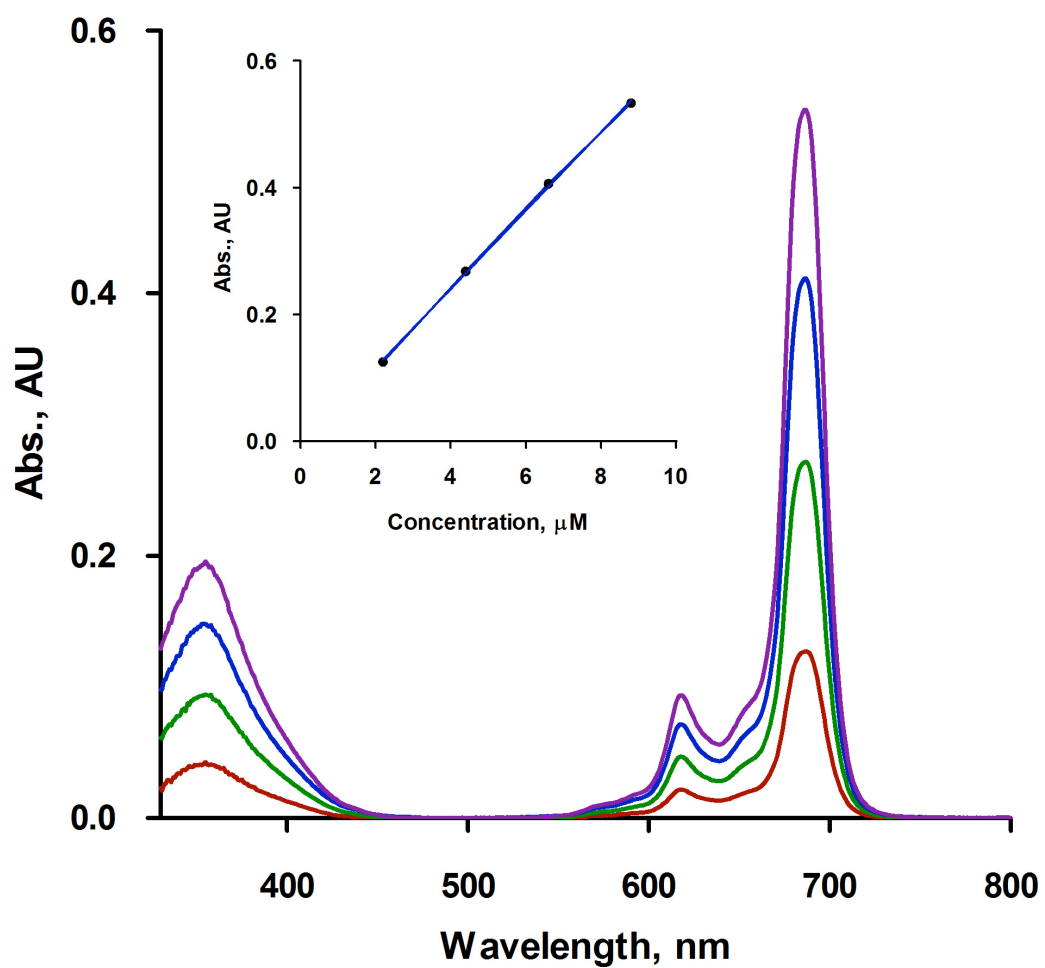

**Figure S5.** UV-Vis spectra for Pc **6b** in DMF: 2.2  $\mu\text{M}$  (red), 4.4  $\mu\text{M}$  (green), 6.6  $\mu\text{M}$  (blue) and 8.8  $\mu\text{M}$  (purple).



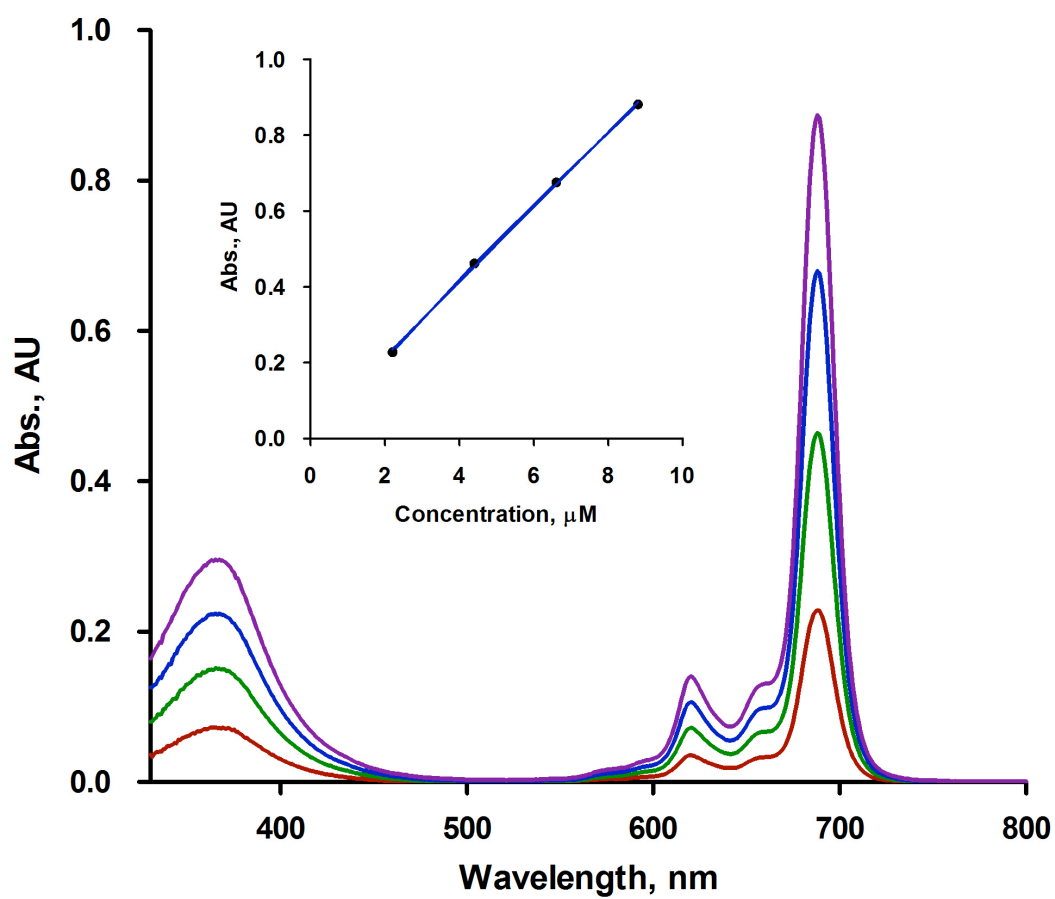

**Figure S6.** UV-Vis spectra for Pc 14 in DMF: 2.2  $\mu\text{M}$  (red), 4.4  $\mu\text{M}$  (green), 6.6  $\mu\text{M}$  (blue) and 8.8  $\mu\text{M}$  (purple).

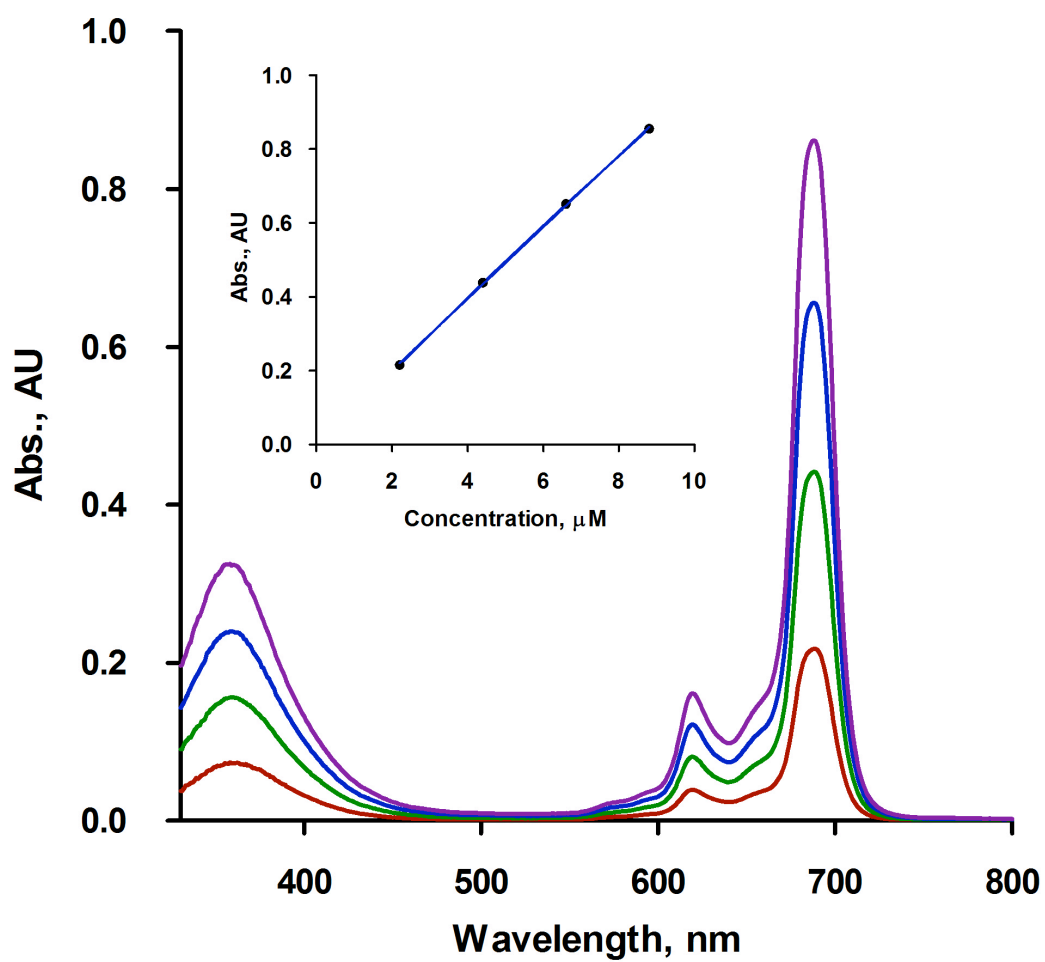

**Figure S7.** UV-Vis spectra for Pc **8** in DMF: 2.2  $\mu\text{M}$  (red), 4.4  $\mu\text{M}$  (green), 6.6  $\mu\text{M}$  (blue) and 8.8  $\mu\text{M}$  (purple).

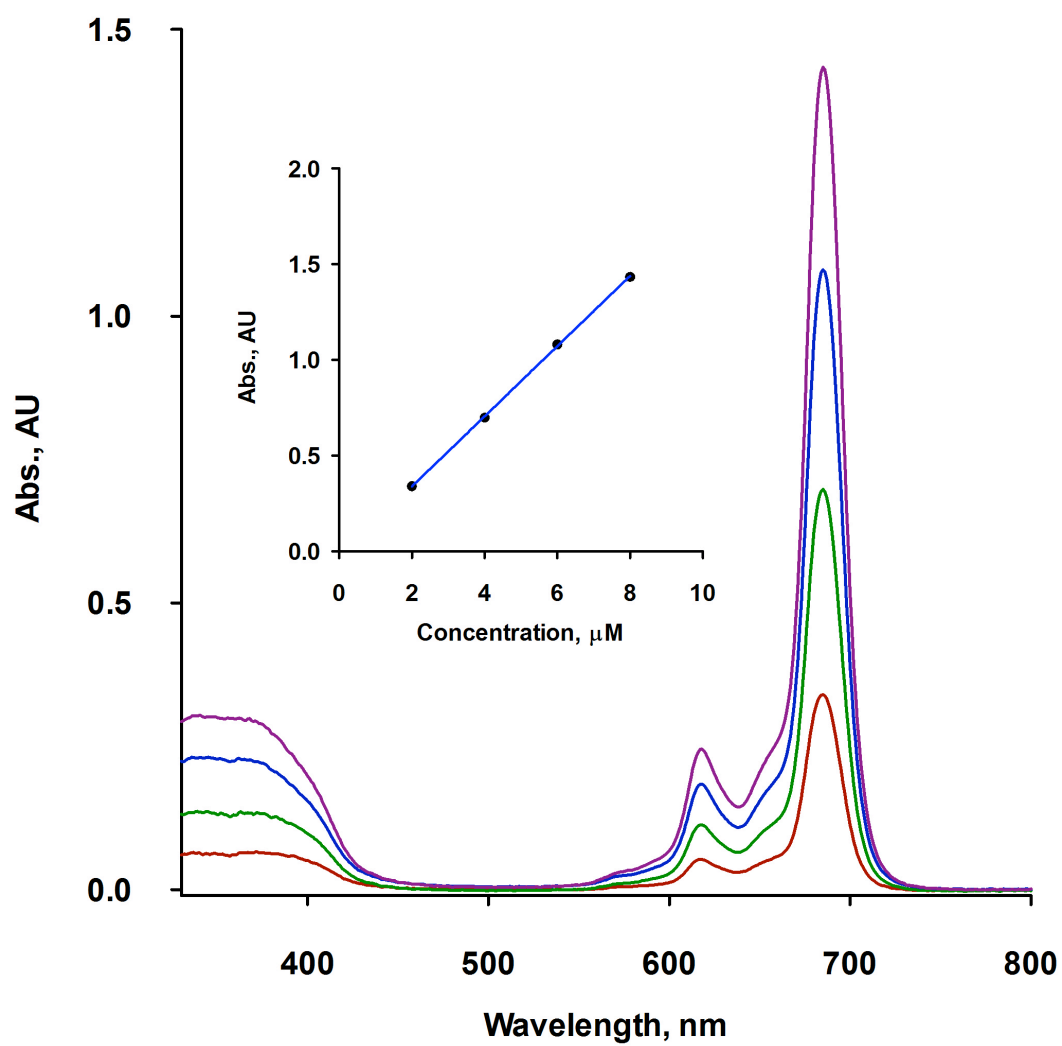

**Figure S8.** UV-Vis spectra for Pc 17a in DMF: 2.0  $\mu\text{M}$  (red), 4.0  $\mu\text{M}$  (green), 6.0  $\mu\text{M}$  (blue) and 8.0  $\mu\text{M}$  (purple).

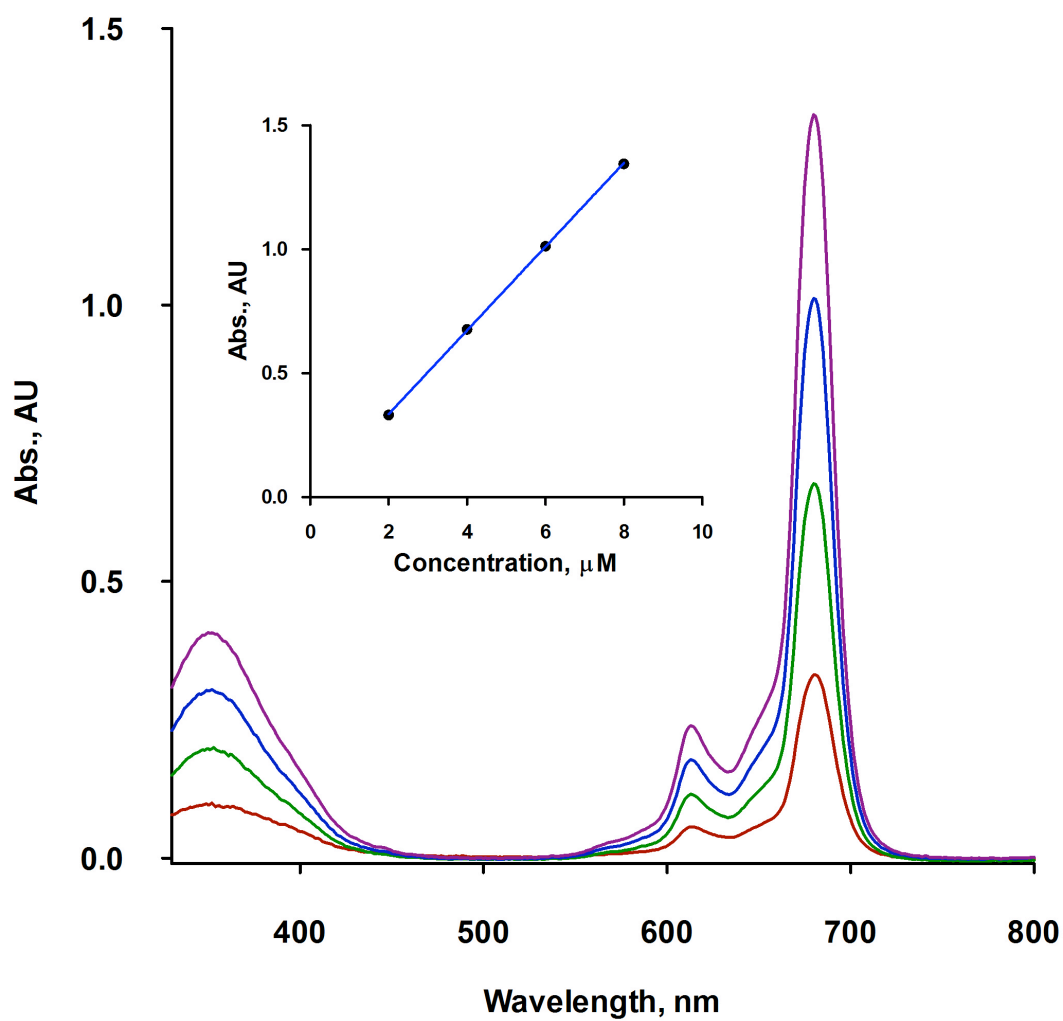

**Figure S9.** UV-Vis spectra for Pc 17b in DMF: 2.0  $\mu\text{M}$  (red), 4.0  $\mu\text{M}$  (green), 6.0  $\mu\text{M}$  (blue) and 8.0  $\mu\text{M}$  (purple).

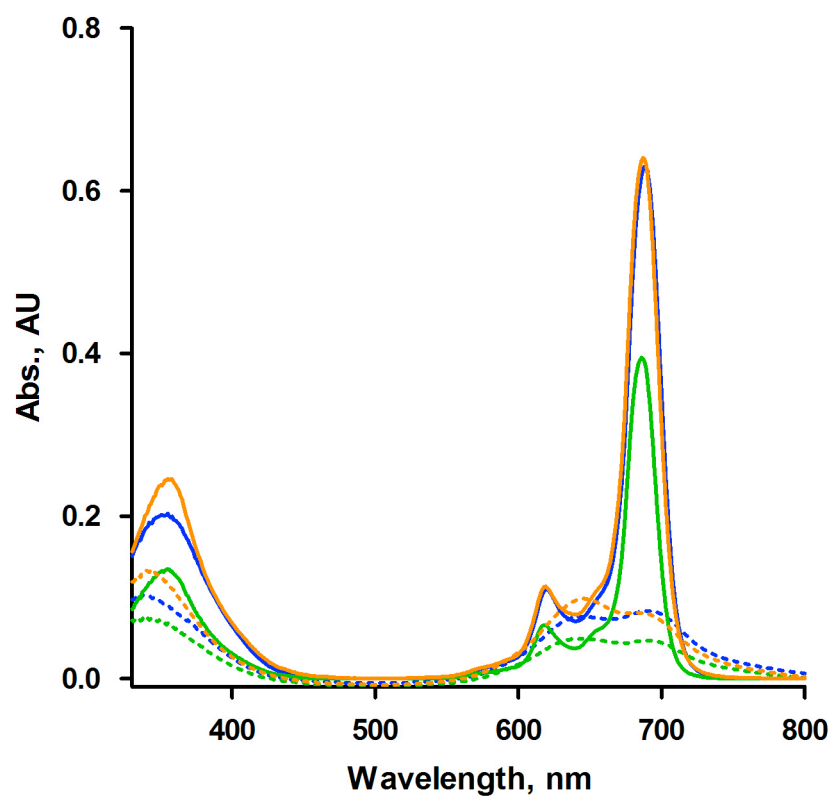

**Figure S10.** UV-Vis spectra for Pc **4a** (blue), **4b** (green), and **12** (orange) at 8.8  $\mu\text{M}$  in DMF; **4a** (dotted blue), **4b** (dotted green), and **12** (dotted orange) at 8.8  $\mu\text{M}$  in PBS, pH 7.4.

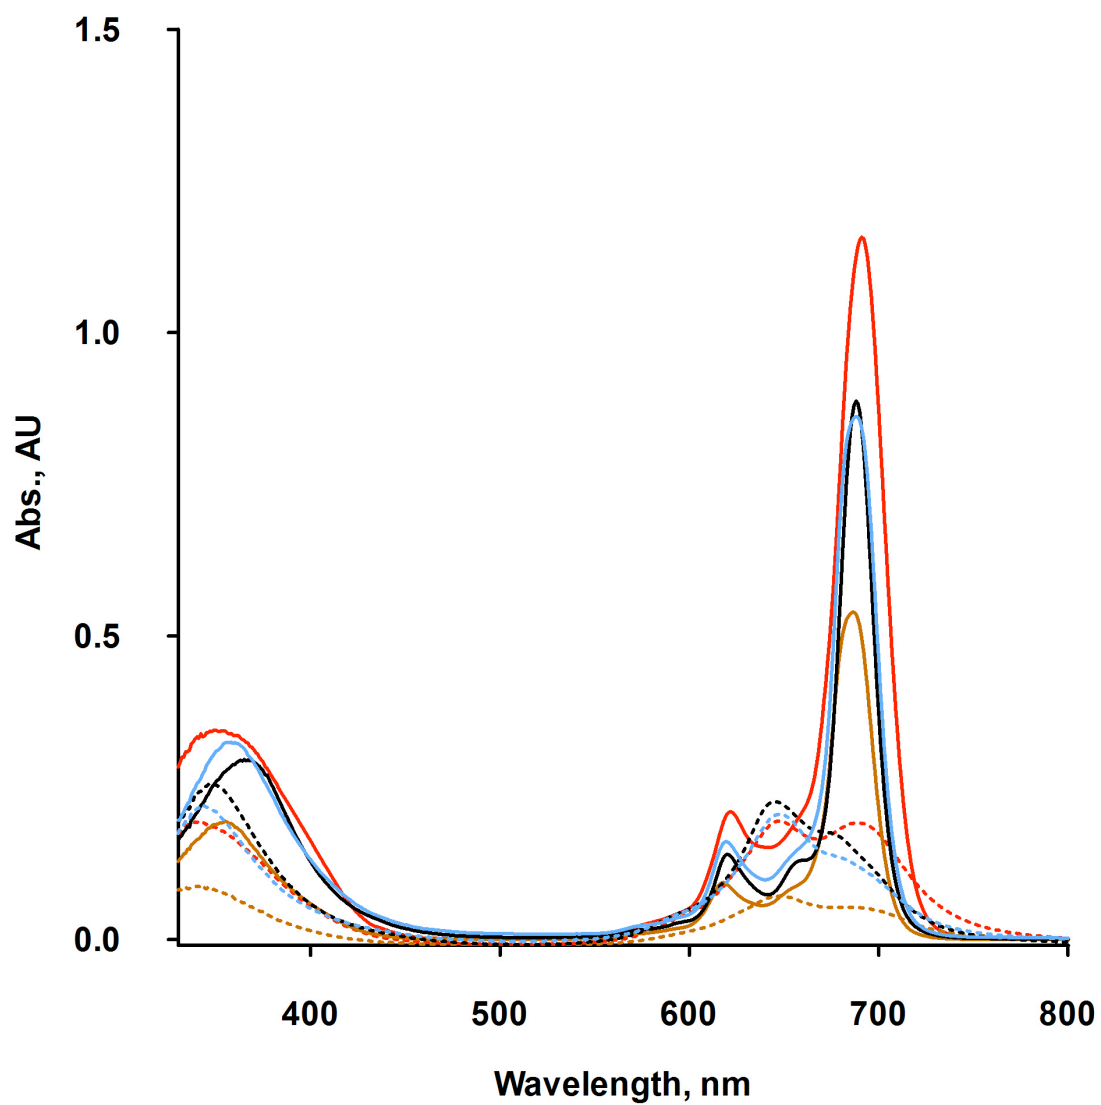

**Figure S11.** UV-Vis spectra for Pc **6a** (red), **6b** (brown), **8** (violet) and **14** (black) at 8.8  $\mu\text{M}$  in DMF; **6a** (dotted red), **6b** (dotted brown), **8** (dotted violet) and **14** (dotted black) at 8.8  $\mu\text{M}$  in PBS, pH 7.4.

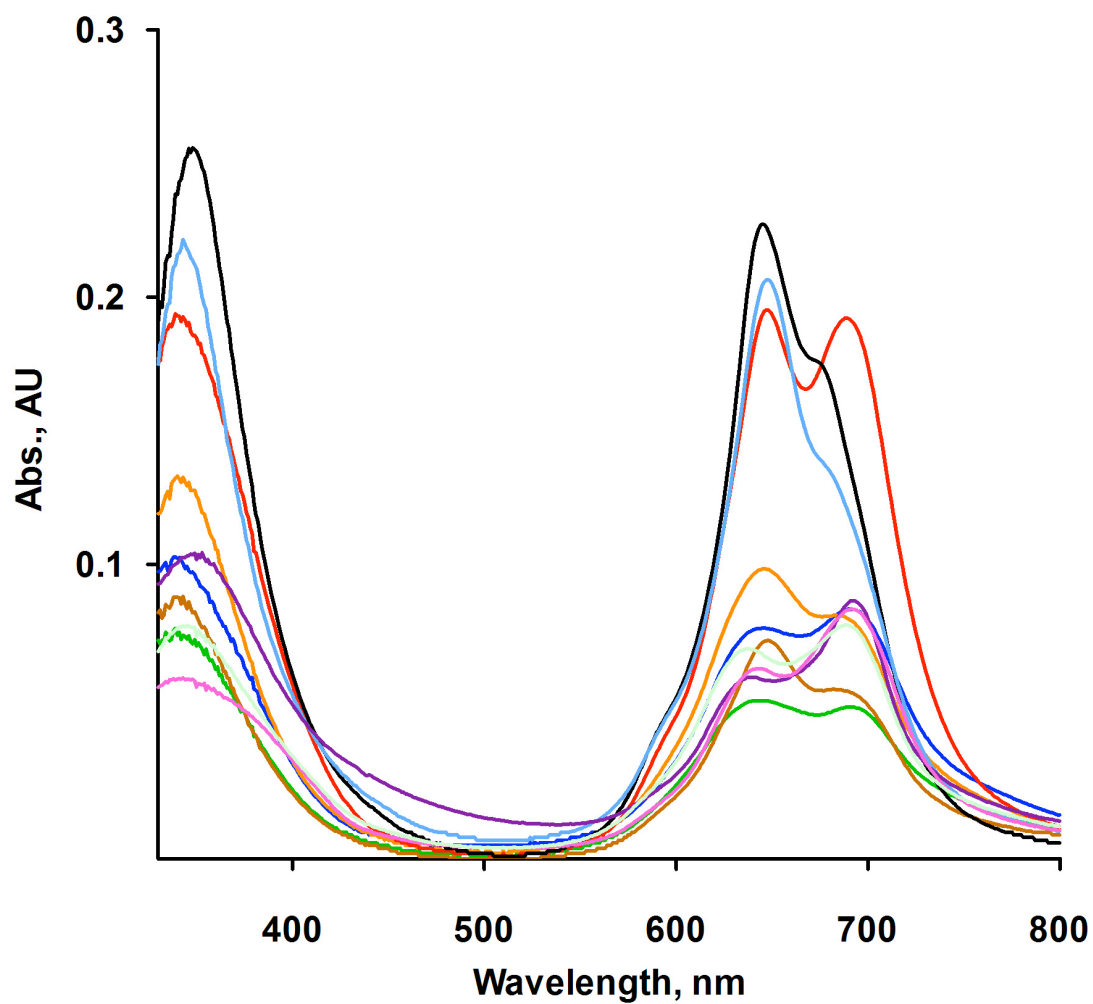

**Figure S12.** UV-Vis spectra for Pc **4a** (blue), **4b** (green), **6a** (red), **6b** (brown), **8** (light blue), **12** (orange), **13** (purple), **14** (black), **17a** (pink) and **17b** (light green) at 8.8  $\mu\text{M}$  in PBS, pH 7.4.

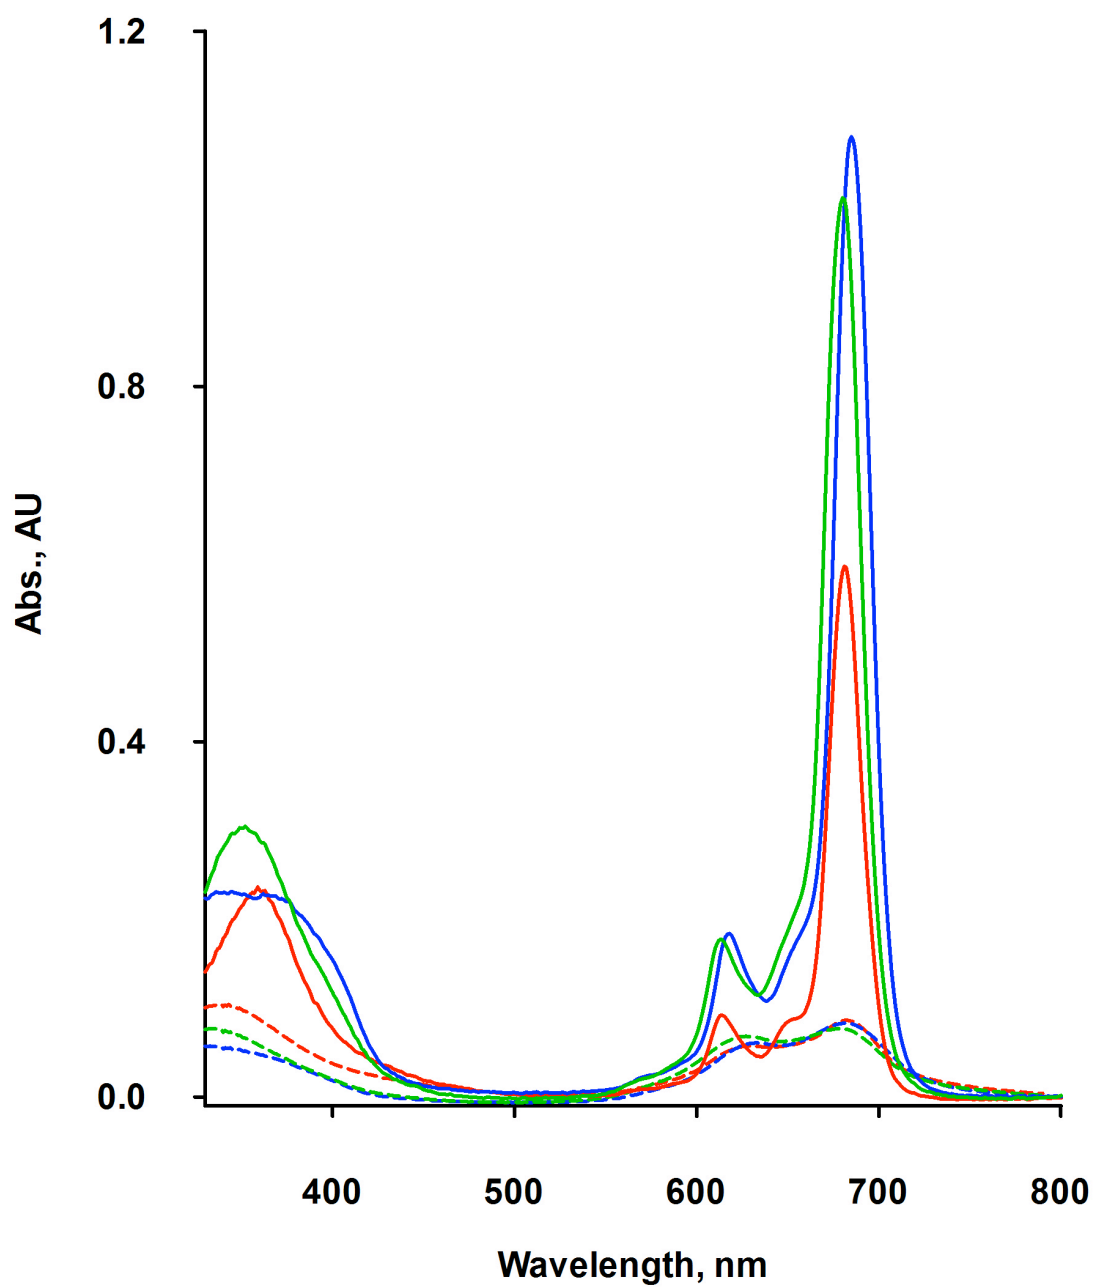

**Figure S13.** UV-Vis spectra for Pc **13** (red), **17a** (blue) and **17b** (green) at 6.0  $\mu\text{M}$  in DMF; **13** (dotted red), **17a** (dotted blue), **17b** (dotted green) at 6.0  $\mu\text{M}$  in PBS, pH 7.4.



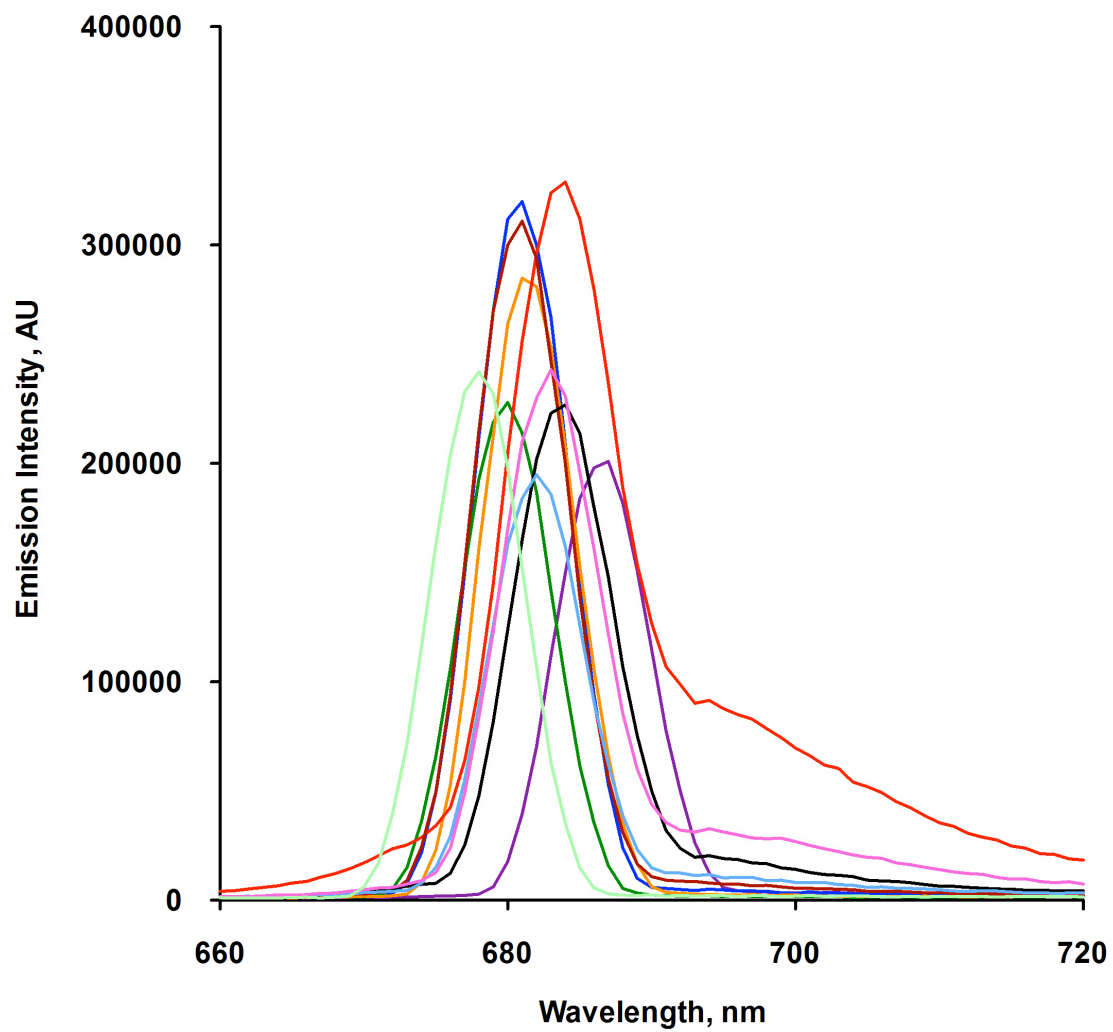

**Figure S14.** Emission spectra for Pc **4a** (blue), **4b** (green), **6a** (red), **6b** (brown), **8** (light blue), **12** (orange), **13** (violet), **14** (black), **17a** (pink) and **17b** (light green) at 6.0  $\mu\text{M}$  in PBS, pH 7.4.

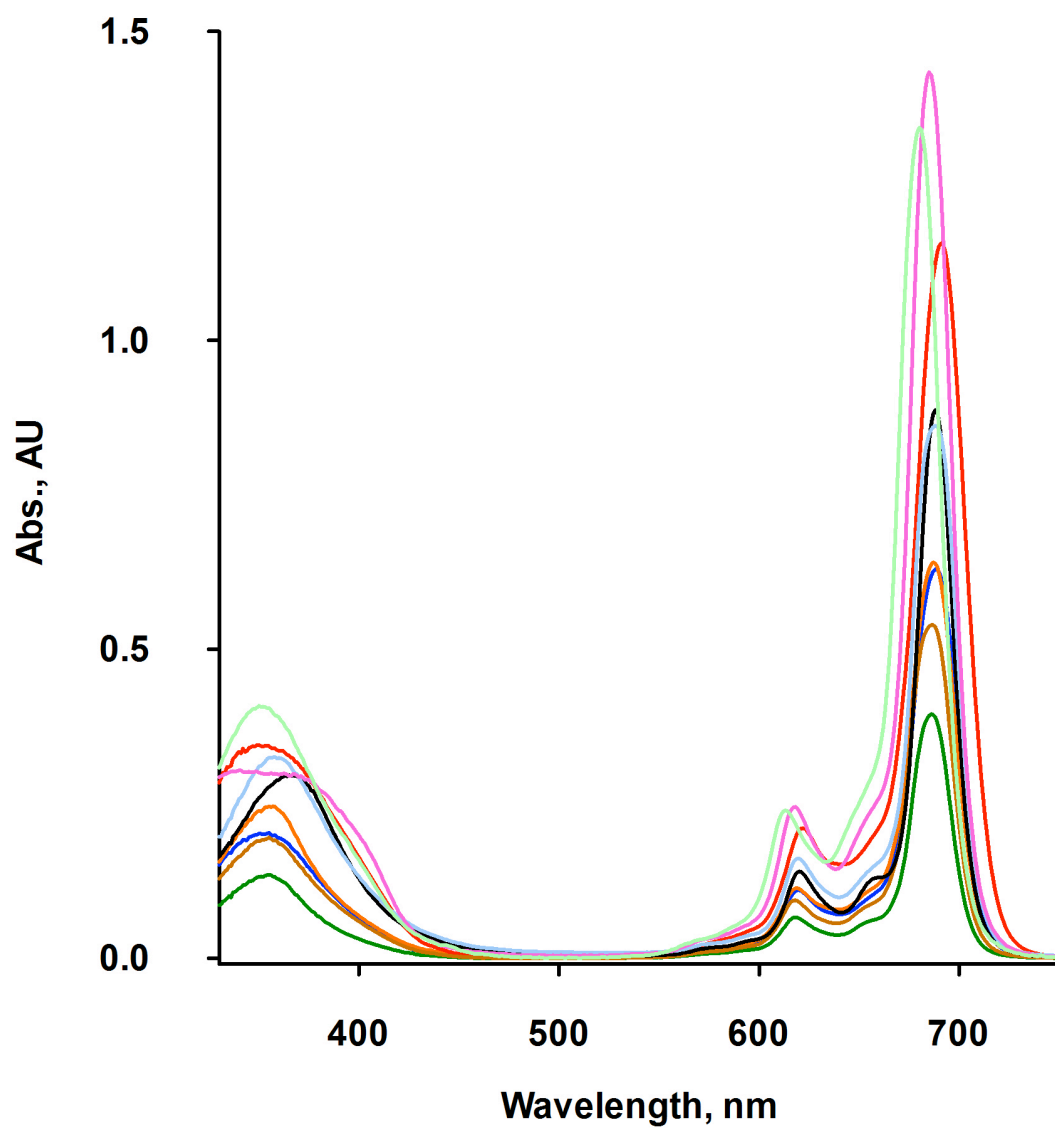

**Figure S15.** UV-Vis spectra for Pc **4a** (blue), **4b** (green), **6a** (red), **6b** (brown), **8** (light blue), **12** (orange), **14** (black), **17a** (pink) and **17b** (light green) at 8.0  $\mu\text{M}$  in DMF.

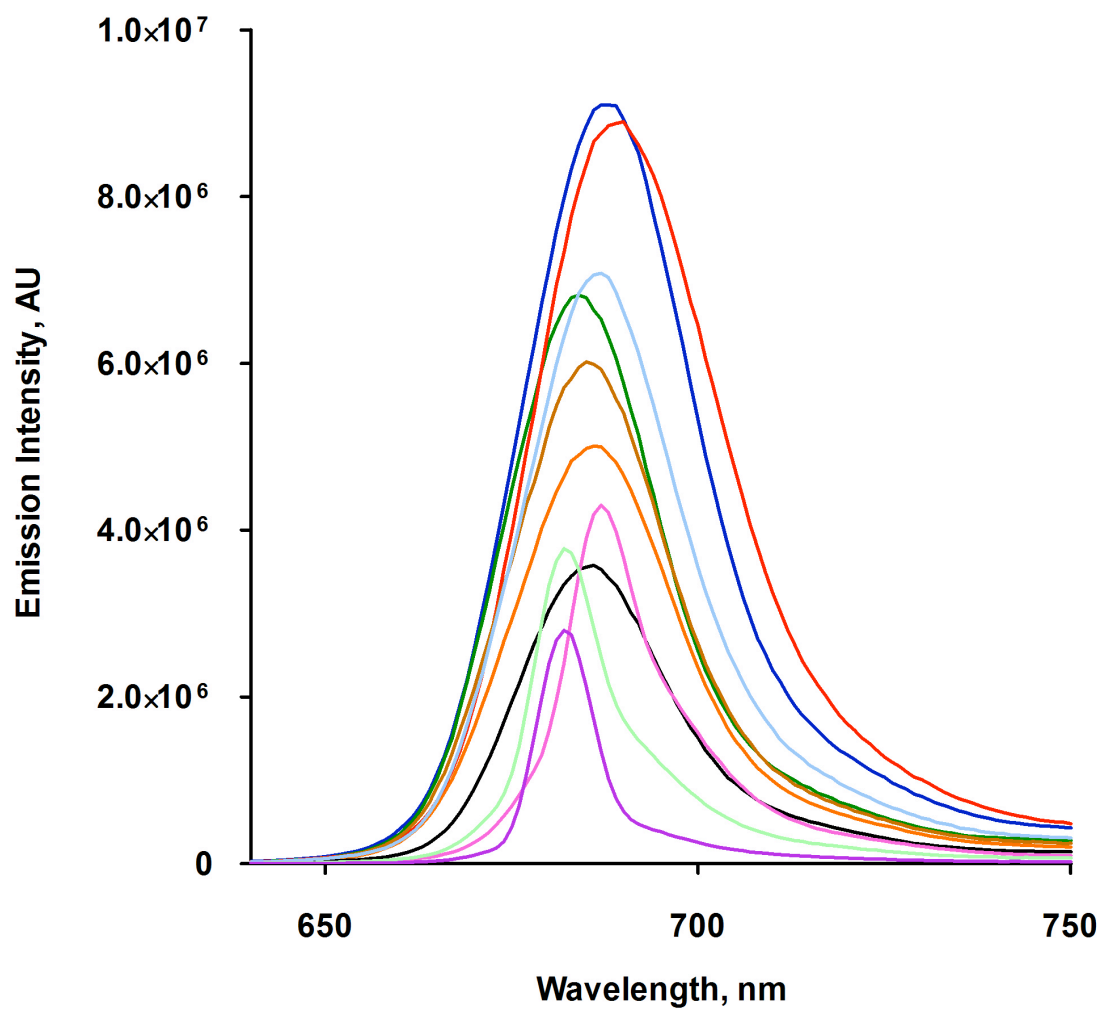

**Figure S16.** Emission spectra for Pc **4a** (blue), **4b** (green), **6a** (red), **6b** (brown), **8** (light blue), **12** (orange), **13** (violet), **14** (black), **17a** (pink) and **17b** (light green) in DMF.
